# Supplementary material for: Response Surface Methodology for Optimization of Hydrogel-Forming Microneedles as Rapid and Efficient Transdermal Microsampling Tools
Source: MDPI journal article supplement (doi:10.3390/gels9040306), 2023-04-06
Supplement: s1 [file s1]

## Supplementary Materials

**Table S1.** Hydrogel film formulations.

| Formulation No. | Amount (%w/w)   |               |        |
|-----------------|-----------------|---------------|--------|
|                 | Hyaluronic acid | Gantrez™ S-97 | Pectin |
| 1               | 0.76            | 1.50          | 1.00   |
| 2               | 2.00            | 1.00          | 0.50   |
| 3               | 2.00            | 1.00          | 1.00   |
| 4               | 2.00            | 1.00          | 1.50   |
| 5               | 2.00            | 1.50          | 0.50   |
| 6               | 2.00            | 1.50          | 1.00   |
| 7               | 2.00            | 1.50          | 1.50   |
| 8               | 2.00            | 2.00          | 0.50   |
| 9               | 2.00            | 2.00          | 1.00   |
| 10              | 2.00            | 2.00          | 1.50   |
| 11              | 5.00            | 0.79          | 1.00   |
| 12              | 5.00            | 1.00          | 0.50   |
| 13              | 5.00            | 1.00          | 1.50   |
| 14              | 5.00            | 1.50          | 0.29   |
| 15              | 5.00            | 1.50          | 1.00   |
| 16              | 5.00            | 1.50          | 1.50   |
| 17              | 5.00            | 1.50          | 1.71   |
| 18              | 5.00            | 2.00          | 0.50   |
| 19              | 5.00            | 2.00          | 1.00   |
| 20              | 5.00            | 2.00          | 1.50   |
| 21              | 5.00            | 2.21          | 1.00   |
| 22              | 8.00            | 1.00          | 1.00   |
| 23              | 8.00            | 1.50          | 0.50   |
| 24              | 8.00            | 1.00          | 1.50   |
| 25              | 8.00            | 1.50          | 1.50   |
| 26              | 8.00            | 2.00          | 0.50   |
| 27              | 8.00            | 2.00          | 1.00   |
| 28              | 8.00            | 2.00          | 1.50   |
| 29              | 9.24            | 1.50          | 1.00   |
